# Supplementary material for: Public Protests and the Risk of Novel Coronavirus Disease Hospitalizations: A County-Level Analysis from California
Source: MDPI journal article supplement (doi:10.3390/ijerph18189481), 2021-09-08

**Supplementary Figure S1: Observed versus predicted COVID-19 hospitalization rates using time-trend spline, averaged across all 55 counties and for each county, using mixed negative binomial models of the association between having any protests and two-week post-protest COVID-19 hospitalization**

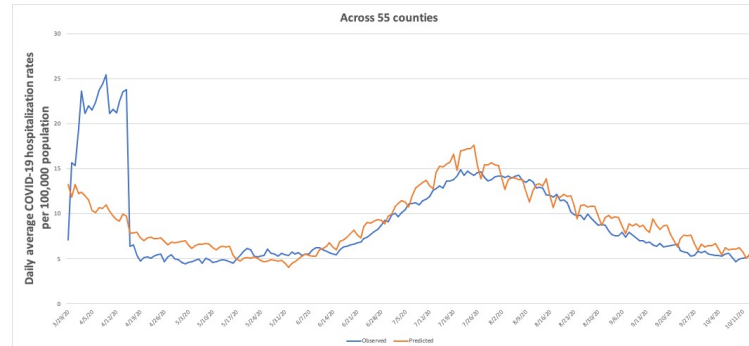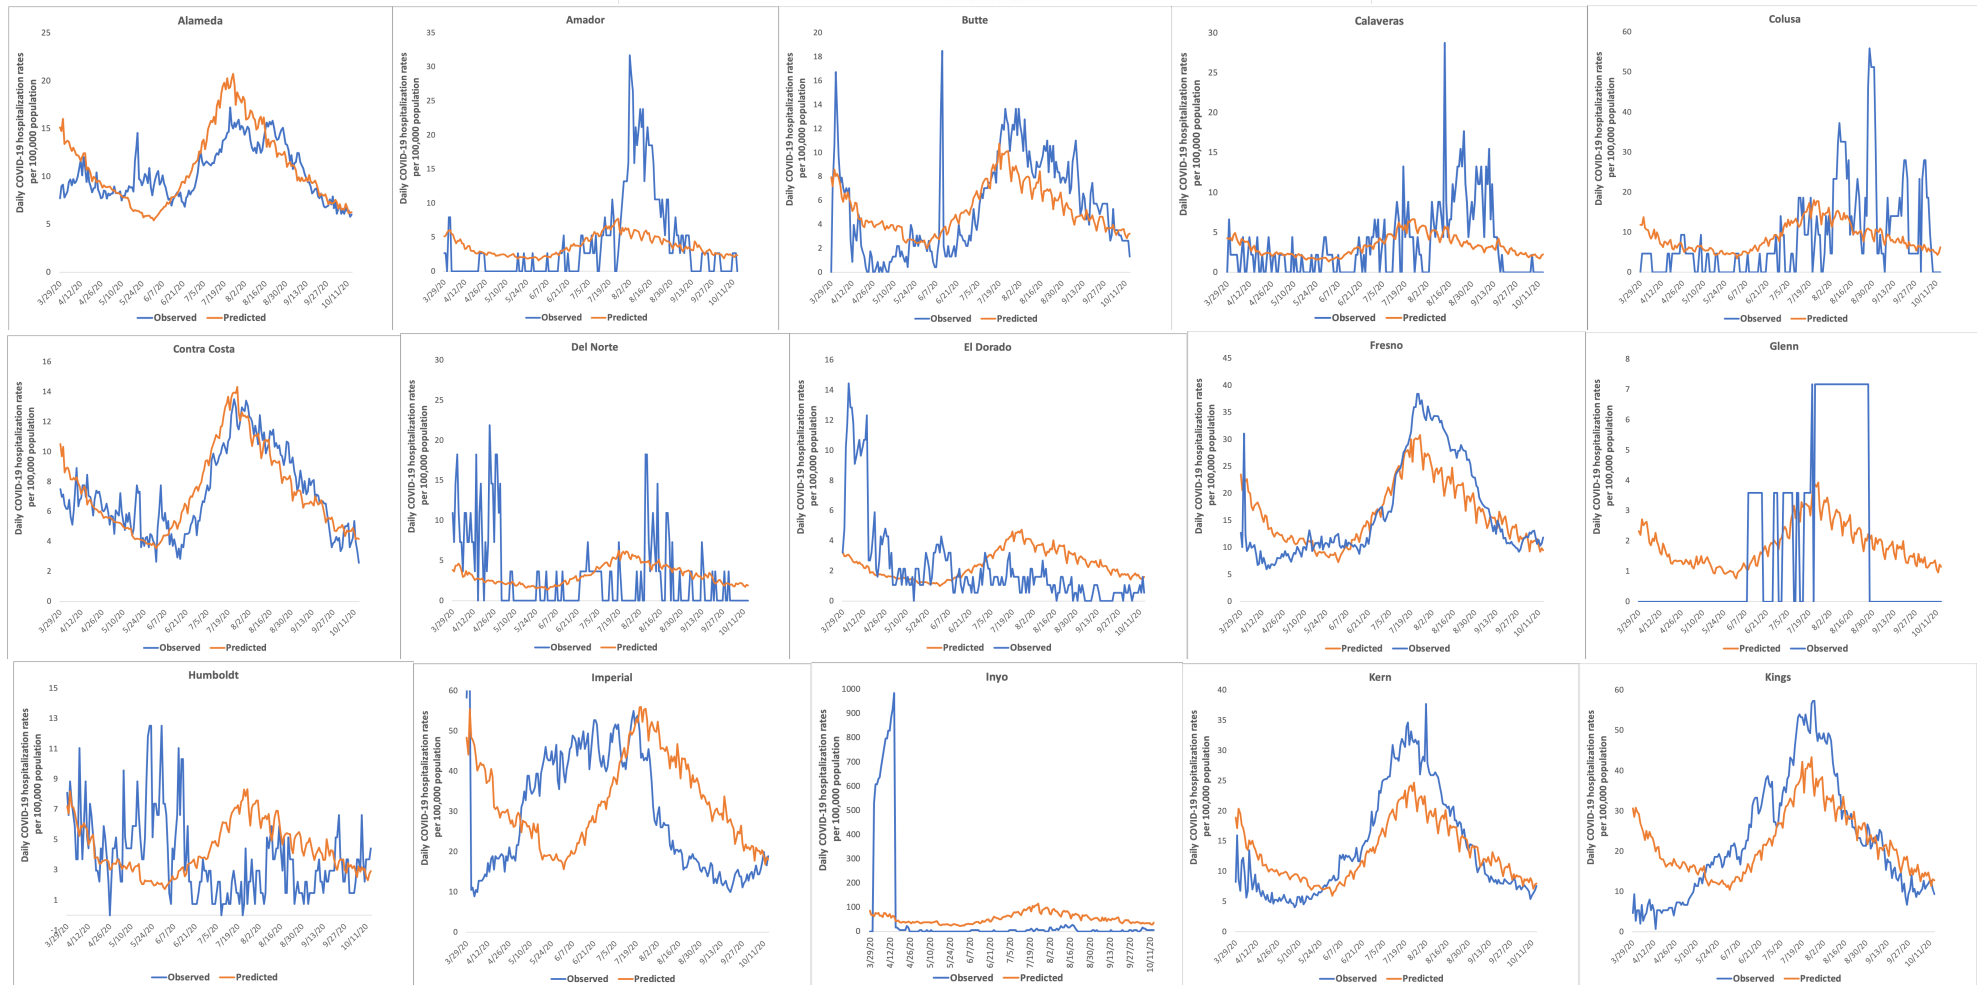

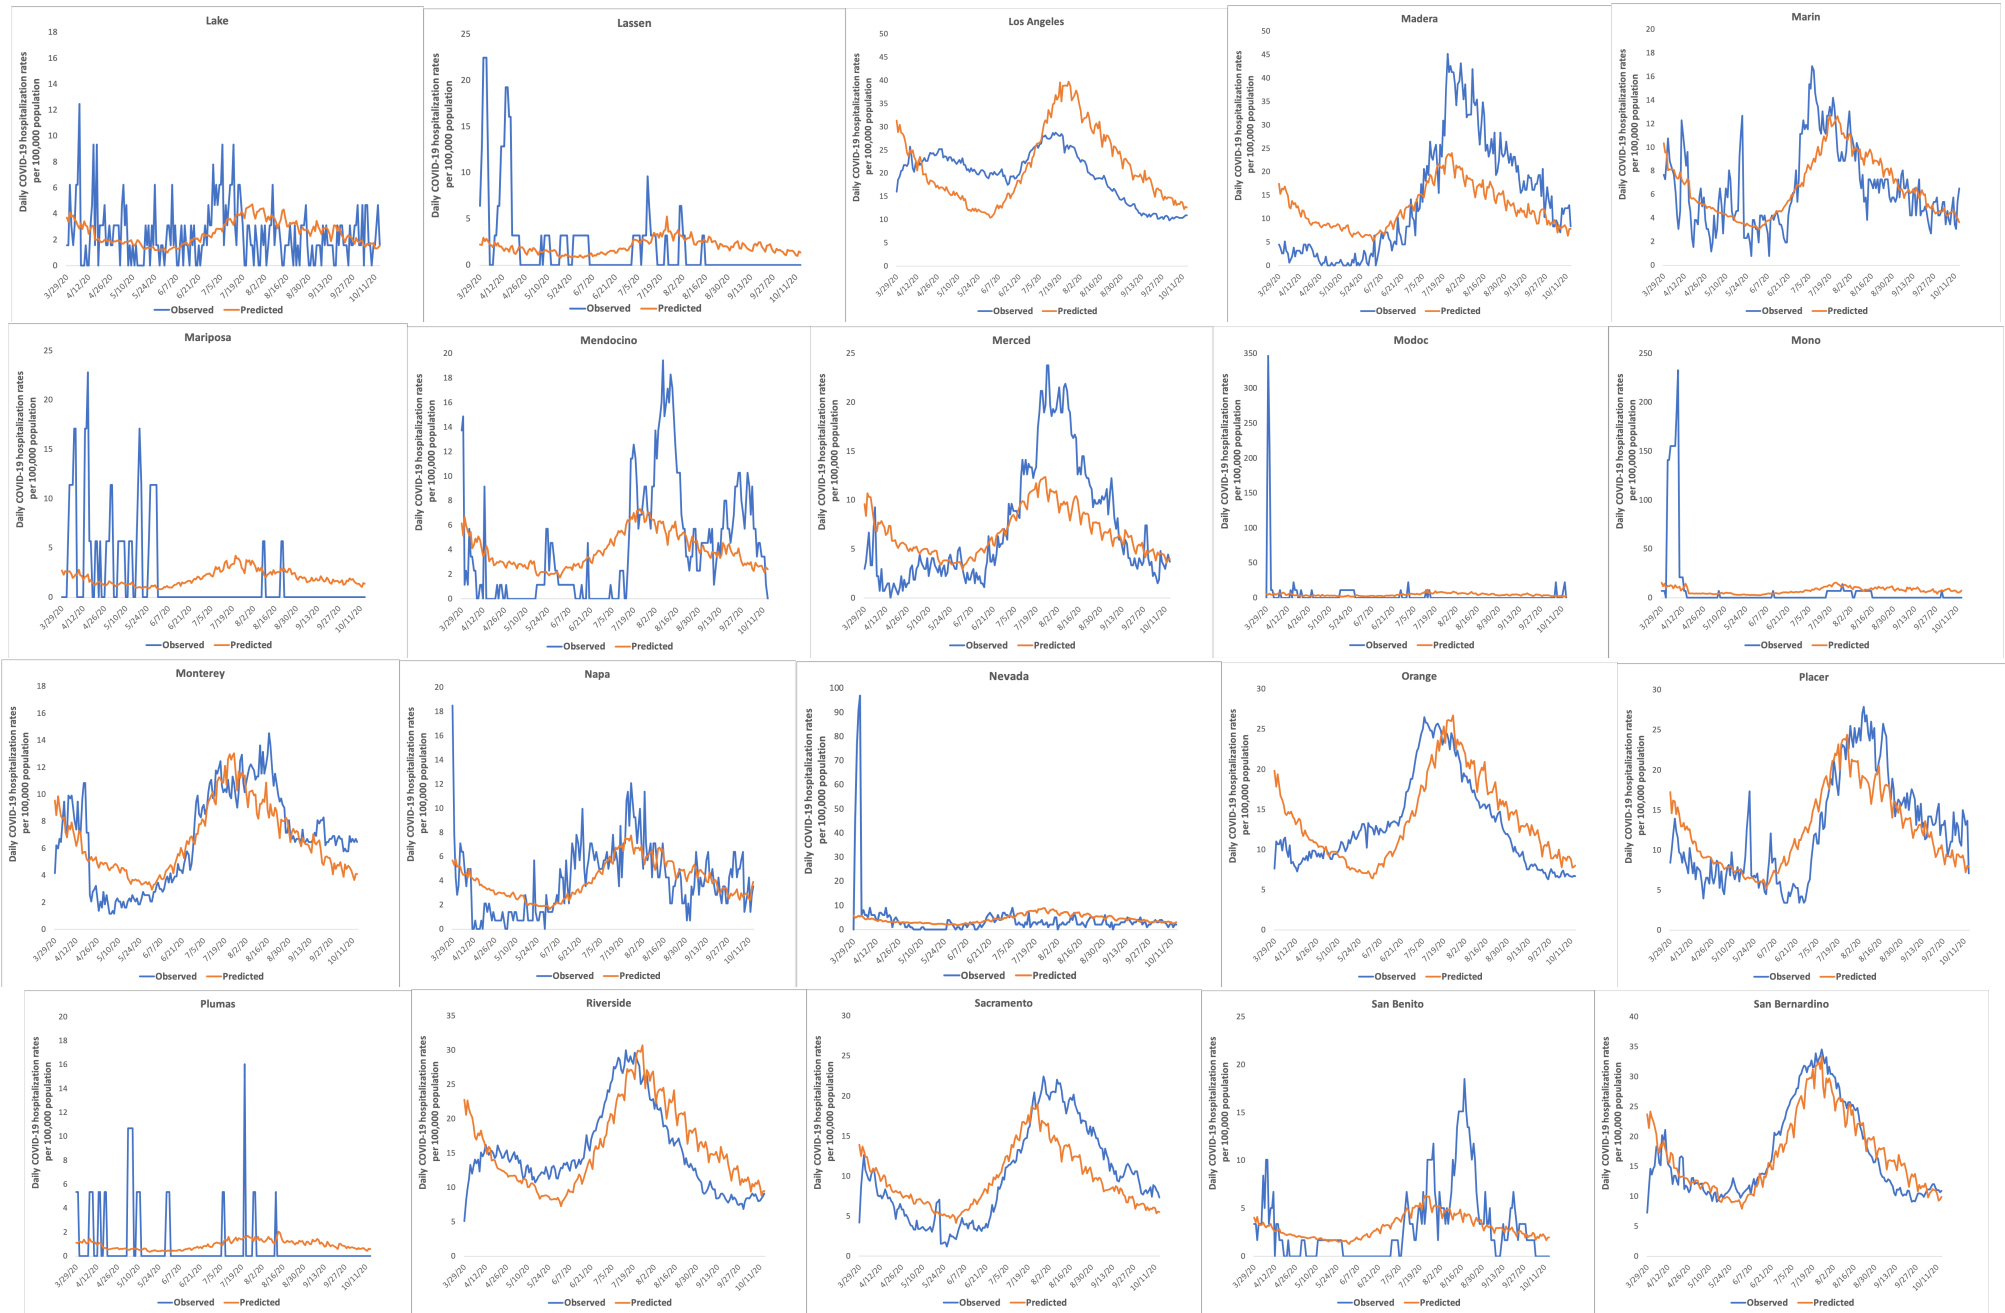

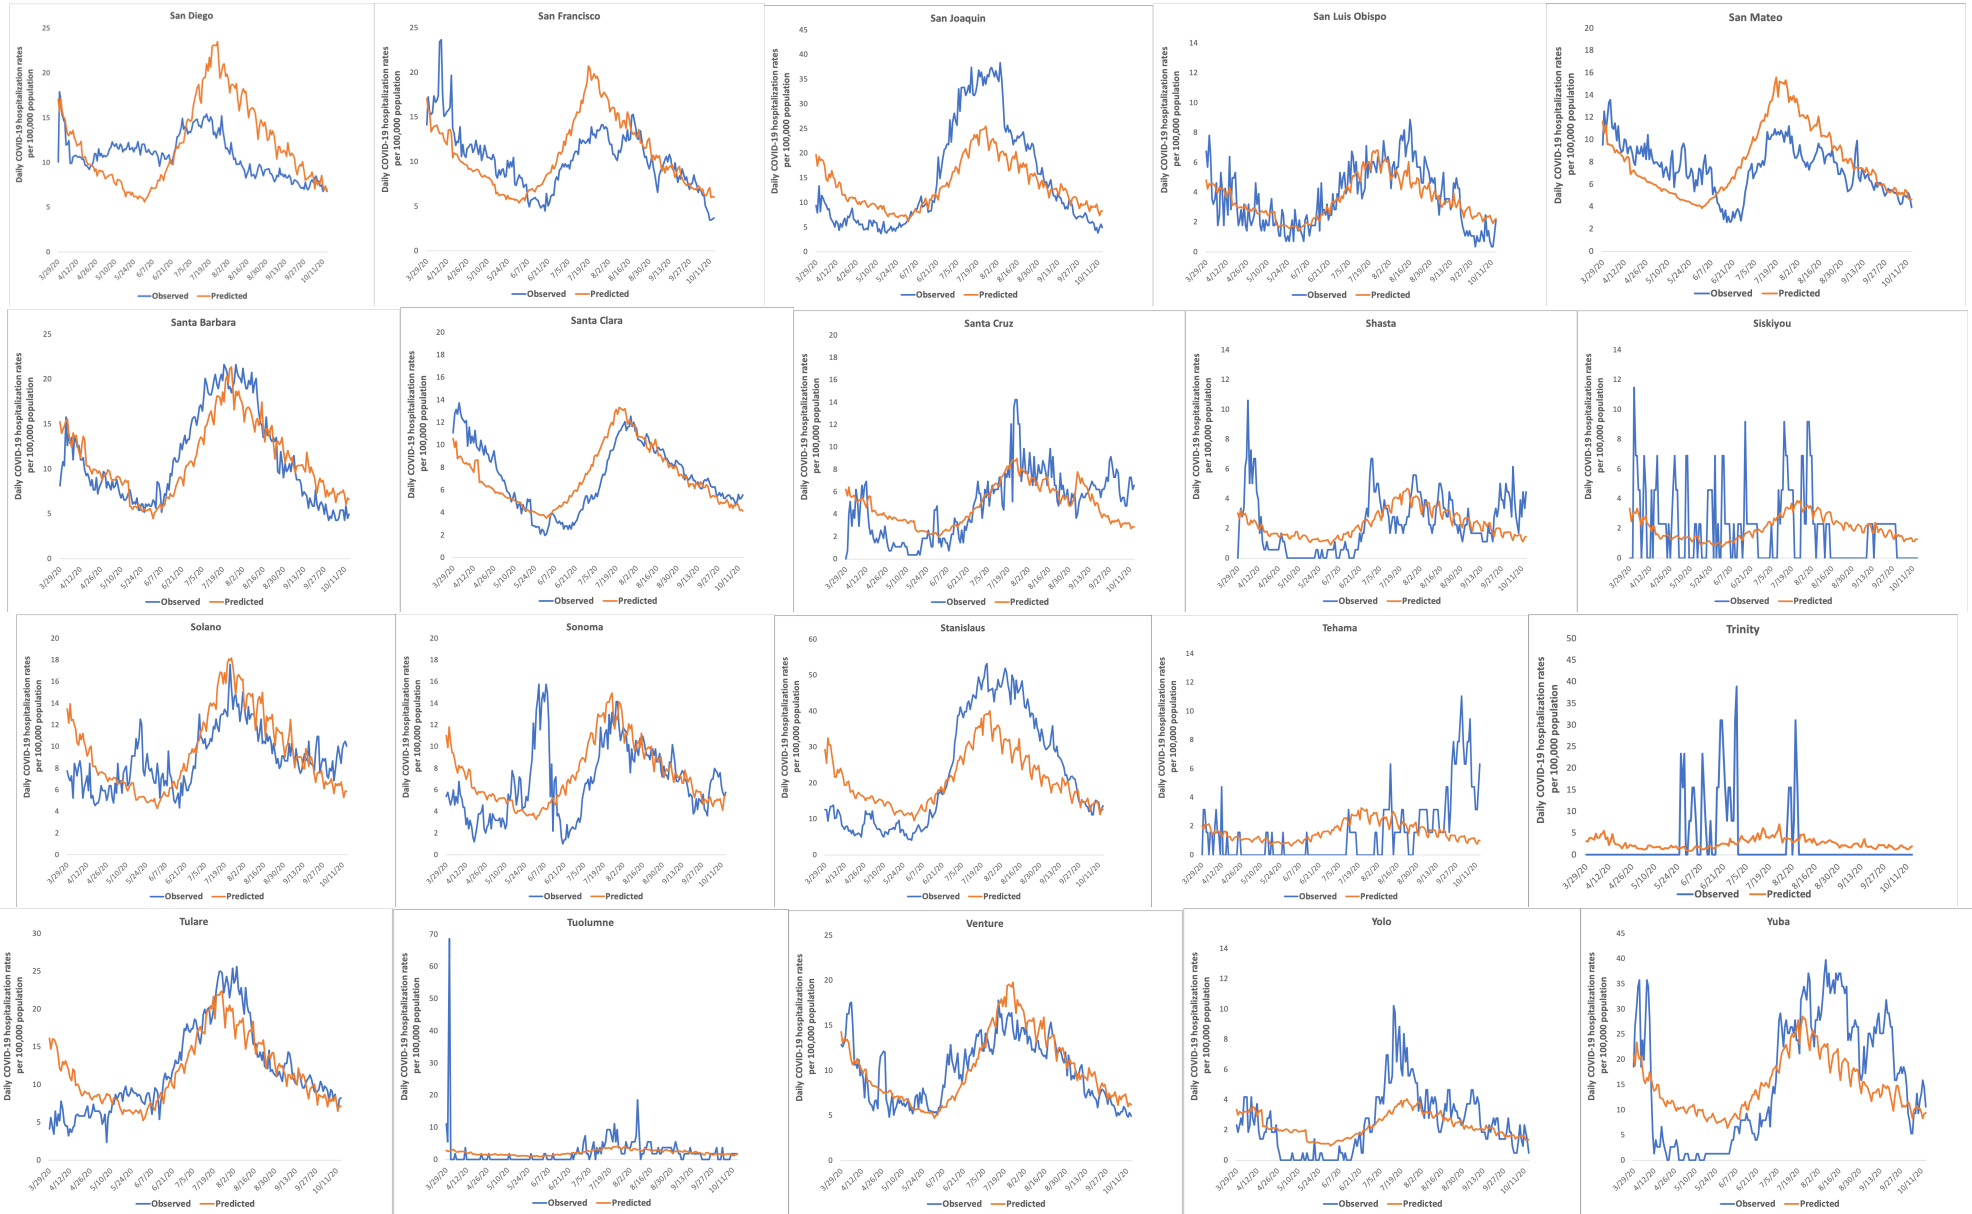

Supplement: s1 [file s1]
