# Supplementary material for: Public Protests and the Risk of Novel Coronavirus Disease Hospitalizations: A County-Level Analysis from California
Source: MDPI journal article supplement (doi:10.3390/ijerph18189481), 2021-09-08
Supplement: s1 [file s1]

**Supplemental Table S3: Incidence rate ratios (IRR) and 95% Confidence Interval (95% CI) from multivariable mixed negative binomial models: Association between protests and two-week post-protest COVID-19 hospitalization across 51 California counties (after removing 3 counties with outliers of hospitalization), March 29<sup>th</sup> – October 14<sup>th</sup>, 2020**

|                              | All counties (N=51 counties) |                            |
|------------------------------|------------------------------|----------------------------|
|                              | Model 1s<br>IRR(95% CI)      | Model 2s<br>IRR(95% CI)    |
| Any protest                  | 0.925**<br>(0.878; 0.975)    | --                         |
| 1 protest                    | --                           | 0.926**<br>(0.879; 0.975)  |
| >1 protest                   | --                           | 0.923<br>(0.851; 1.001)    |
| % of devices staying at home | 0.987**<br>(0.977; 0.996)    | 0.987**<br>(0.977; 0.996)  |
| Healthy Places Index         | 0.559<br>(0.177; 1.762)      | 0.558<br>(0.177; 1.763)    |
| % with diabetes              | 1.055<br>(0.967; 1.152)      | 1.055<br>(0.967; 1.152)    |
| % obese                      | 0.956**<br>(0.924; 0.988)    | 0.956**<br>(0.924; 0.988)  |
| % smokers                    | 0.964<br>(0.799; 1.163)      | 0.964<br>(0.799; 1.163)    |
| % male                       | 0.965<br>(0.909; 1.024)      | 0.965<br>(0.909; 1.024)    |
| Median age                   | 1.030<br>(0.949; 1.119)      | 1.030<br>(0.949; 1.119)    |
| % Hispanic                   | 1.025**<br>(1.006; 1.043)    | 1.025**<br>(1.006; 1.043)  |
| % Black <sup>1</sup>         | 1.077***<br>(1.035; 1.122)   | 1.077***<br>(1.035; 1.122) |
| % AI/AN <sup>2</sup>         | 0.971<br>(0.827; 1.140)      | 0.971<br>(0.827; 1.140)    |
| % of urban housing units     | 1.018*<br>(1.002; 1.034)     | 1.018*<br>(1.002; 1.034)   |
| Democratic county            | 0.754<br>(0.463; 1.228)      | 0.754<br>(0.463; 1.228)    |
| Spline 1 (before 06/01)      | 0.991**<br>(0.986; 0.996)    | 0.991**<br>(0.986; 0.996)  |
| Spline 2 (06/01-07/21)       | 1.035***<br>(1.025; 1.044)   | 1.035***<br>(1.025; 1.044) |
| Spline 3 (07/22-10/14)       | 0.961***<br>(0.955; 0.967)   | 0.961***<br>(0.955; 0.967) |

<sup>1</sup>Non-Hispanic Black or African American; <sup>2</sup>Non-Hispanic American Indian/Alaska Native

\* p<0.05, \*\* p<0.01, \*\*\* p<0.001
