# Supplementary material for: Public Protests and the Risk of Novel Coronavirus Disease Hospitalizations: A County-Level Analysis from California
Source: MDPI journal article supplement (doi:10.3390/ijerph18189481), 2021-09-08
Supplement: s1 [file s1]

**Supplementary Table S2: Incidence rate ratios (IRR) and 95% Confidence Interval (95% CI) from multivariable mixed negative binomial models: Association between protests and one-week, three-week, and four-week post-protest COVID-19 hospitalization across 55 California counties, March 29<sup>th</sup> – October 14<sup>th</sup>, 2020**

|             | One-week post-protest<br>COVID-19 hospitalization <sup>1</sup><br>IRR(95% CI) |                         | Three-week post-protest<br>COVID-19 hospitalization <sup>1</sup><br>IRR(95% CI) |                         | Four-week post-protest<br>COVID-19 hospitalization <sup>1</sup><br>IRR(95% CI) |                         |
|-------------|-------------------------------------------------------------------------------|-------------------------|---------------------------------------------------------------------------------|-------------------------|--------------------------------------------------------------------------------|-------------------------|
| Any protest | 1.025<br>(0.944;<br>1.112)                                                    | --                      | 0.957<br>(0.888; 1.032)                                                         | --                      | 0.984<br>(0.914; 1.060)                                                        | --                      |
| 1 protest   | --                                                                            | 1.017<br>(0.941; 1.100) | --                                                                              | 0.959<br>(0.892; 1.030) | --                                                                             | 0.992<br>(0.927; 1.062) |
| >1 protest  | --                                                                            | 0.951<br>(0.867; 1.044) | --                                                                              | 0.952<br>(0.857; 1.058) | --                                                                             | 0.964<br>(0.858; 1.082) |

<sup>1</sup>All models adjusted for the following covariates: % of devices staying home, Healthy Places index, % with diabetes, % obese, % smokers, % male, Median age, % Hispanic, %Non-Hispanic Black or African American (Black), % Non-Hispanic American Indian/Alaska Native (AI/AN), % of urban housing units, Democratic county, and three spline variables accounting for time trend  
 \* p<0.05, \*\* p<0.01, \*\*\* p<0.001
