# Supplementary material for: Public Protests and the Risk of Novel Coronavirus Disease Hospitalizations: A County-Level Analysis from California
Source: MDPI journal article supplement (doi:10.3390/ijerph18189481), 2021-09-08
Supplement: s1 [file s1]

## Supplemental Table S1: Description of Count Love tag series included in author-generated protest-type categories

### For racial/social justice (N=78 unique tag series)

Civil Rights; Collective Bargaining; For racial justice; For better compensation \* Civil Rights; Collective Bargaining; For racial justice; For worker rights \* Civil Rights; Education; For racial justice \* Civil Rights; Education; For racial justice; Against police presence \* Civil Rights; Education; For racial justice; For affirmative action \* Civil Rights; For criminal justice reform; Prisons \* Civil Rights; For greater accountability; Police \* Civil Rights; For greater inclusion \* Civil Rights; For racial justice \* Civil Rights; For racial justice; Against business \* Civil Rights; For racial justice; Against colonization \* Civil Rights; For racial justice; Against colonization; Native Americans \* Civil Rights; For racial justice; Against Confederate symbol \* Civil Rights; For racial justice; Against white supremacy \* Civil Rights; For racial justice; For continued investigation \* Civil Rights; For racial justice; For criminal justice; For greater accountability; Police \* Civil Rights; For racial justice; For greater accountability; Police \* Civil Rights; For racial justice; For greater accountability; Counter protest; Police \* Civil Rights; For racial justice; For greater accountability; For freedom of assembly; Police \* Civil Rights; For racial justice; For greater accountability; Police \* Civil Rights; For racial justice; For greater inclusion \* Civil Rights; For racial justice; For transgender rights \* Civil Rights; For racial justice; Martin Luther King, Jr. \* Civil Rights; \* For racial justice; National anthem \* Civil Rights; For racial justice; Pro-LGBTQ \* Civil Rights; For racial justice; Pro-LGBTQ; For greater accountability; Police \* Civil Rights; For racial justice; Pro-LGBTQ; Pride \* Civil Rights; For transgender rights \* Civil Rights; For women's rights; For racial justice \* Civil Rights; For women's rights; For racial justice; For greater accountability; Police \* Civil Rights; Immigration; For racial justice; For compassionate immigration \* Civil Rights; International; For racial justice; For continued investigation \* Civil Rights; Pro-LGBTQ; Counter protest \* Civil Rights; Pro-LGBTQ; Pride \* Collective Bargaining; Against layoffs; Against punishment \* Collective Bargaining; Against layoffs; Coronavirus \* Collective Bargaining; Against understaffing \* Collective Bargaining; For better compensation \* Collective Bargaining; For better compensation; Farming \* Collective Bargaining; For unionization; Amazon \* Collective Bargaining; For worker rights \* Collective Bargaining; For worker rights; Uber \* Collective Bargaining; Healthcare; Against closure/relocation; For local services \* Education; Against curriculum changes \* Education; For firing/reassignment \* Education; For tax \* Education; For tax; Business \* Environment; Against fossil fuels \* Environment; Against hazardous conditions; Business; Air \* Environment; Against hazardous conditions; Military \* Environment; Against mining \* Environment; Against tree removal; Utility \* Executive; Against mismanagement; Post Office \* Executive; Against president \* Executive; Against president; Against media \* Executive; Against president; Counter protest \* Immigration; Against border wall \* Immigration; Against ICE \* Immigration; For compassionate immigration \* Immigration; For compassionate immigration; Coronavirus \* International; Against war \* International; Against war; Armenia \* International; For Palestine; Israel \* Legislative; Against congressional representative \* Other; Against development \* Other; Against gentrification; For historic preservation \* Other; Against human trafficking \* Other; Against mismanagement \* Other; Against mismanagement; For homeless residents \* Other; Against sexual/domestic violence; For greater accountability; Military \* Other; Against sexual/domestic violence; Military \* Other; Against violence \* Other; For affordable housing \* Other; For animal welfare \* Other; For homeless residents \* Other; For public transportation \* Other; For senior services \* Other; For veteran services

### Counter racial/social justice (N=14 unique tag series)

Civil Rights; For colonization \* Civil Rights; For colonization; Counter protest \* Civil Rights; For white supremacy \* Civil Rights; For white supremacy; Counter protest  
Civil Rights; Other; Against abortion rights; Against human trafficking; Conspiracy theory \* Collective Bargaining; For supporting police \* Executive; Against state executive \* Executive; For president \* Other; Against human trafficking; Conspiracy theory \* Other; Against tax \* Other; For conservative agenda \* Other; For supporting police \* Other; For supporting police; Counter protest \* Other; For white supremacy; Counter protest

### For pandemic intervention (N=36 unique tag series)

Collective Bargaining; Against hazardous conditions; Against understaffing \* Collective Bargaining; Against hazardous conditions; Coronavirus \* Collective Bargaining; Against layoffs \* Collective Bargaining; Against layoffs; Against hazardous conditions; Coronavirus \* Collective Bargaining; Against layoffs; Coronavirus \* Collective Bargaining; For better compensation \* Collective Bargaining; For better compensation; Against hazardous conditions; Coronavirus \* Collective Bargaining; For better compensation; Transportation; Coronavirus \* Collective Bargaining; For worker rights \* Collective Bargaining; For worker rights; Against hazardous conditions; Coronavirus \* Collective Bargaining; For worker rights; Coronavirus \* Collective Bargaining; Healthcare; Against firing/reassignment; Against hazardous conditions; Coronavirus \* Collective Bargaining; Healthcare; Against hazardous conditions \* Collective Bargaining; Healthcare; Against hazardous conditions; For pandemic intervention; Coronavirus \* Education; Against curriculum changes; Coronavirus \* Education; Against hazardous conditions; Coronavirus \* Education; Against layoffs; Coronavirus \* Education; Against mismanagement; Coronavirus \* Education; Against schedule change; Coronavirus \* Education; For greater funding; For tax \* Executive; Against budget \* Executive; Against mismanagement; Coronavirus \* Healthcare; Against hazardous conditions; Coronavirus \* Healthcare; Against hazardous conditions; Counter protest; Coronavirus \* Healthcare; For pandemic intervention; Business; Coronavirus \* Healthcare; For pandemic intervention; Coronavirus \* Healthcare; For pandemic intervention; Counter protest; Coronavirus \* Other; Against eviction; Coronavirus \* Other; Against hazardous conditions; For homeless residents; Coronavirus \* Other; Against hazardous conditions; Prisons; Coronavirus \* Other; Against tourism; Coronavirus \* Other; For homeless residents; Coronavirus \* Other; For homeless residents; Counter protest; Coronavirus \* Other; For safety net; Coronavirus \* Other; For safety net; Housing; Coronavirus \* Other; For worker rights; For safety net; May Day; Coronavirus

### Against pandemic intervention (N=12 unique tag series)

Education; Against closure/relocation; Coronavirus \* Education; Against hazardous conditions; Coronavirus \* Education; Against pandemic intervention; Coronavirus \* Education; Against schedule change; Against pandemic intervention; Coronavirus \* Executive; Against state executive; Coronavirus \* Executive; Healthcare; For president; Against pandemic intervention; Coronavirus \* Healthcare; Against pandemic intervention; Coronavirus \* Healthcare; Against pandemic intervention; Counter protest; Coronavirus \* Healthcare; For safety net; Against pandemic intervention; Coronavirus \* Other; Against homeless residents; Coronavirus \* Other; Against vaccines \* Other; For safety net; Coronavirus

### Miscellaneous (N=18 unique tag series)

Education; Against closure/relocation \* Education; Against curriculum changes \* Education; Against firing/reassignment \* Education; For firing/reassignment \* Education; For greater participation; Against hazardous conditions \* International; Against foreign government; Azerbaijan \* International; Against foreign government; Israel \* International; Against foreign government; Philippines \* International; For foreign government; Counter protest; Azerbaijan \* Other; Against closure/relocation; Business \* Other; Against closure/relocation; Park \* Other; Against development \* Other; Against punishment; Business \* Other; For continued investigation; Military \* Other; For criminal justice \* Other; For criminal justice reform \* Other; For greater accountability; Military \* Other; For greater funding; For local services; Coronavirus

*Note: All protests had a series of tags (including at least 2 tags) associated with the protest, separated by “;” – we use “ \* ” to separate the unique tag series, encompassing all tag series included in a given Protest Type category. Some tags may appear in more than one category based on associated news article for corresponding protest*
